# Supplementary material
Source: Springer Nature journal article supplement (https://www.springermedizin.de/resource/supplementary/12943_2009_678_MOESM7_ESM.pdf/9554562)

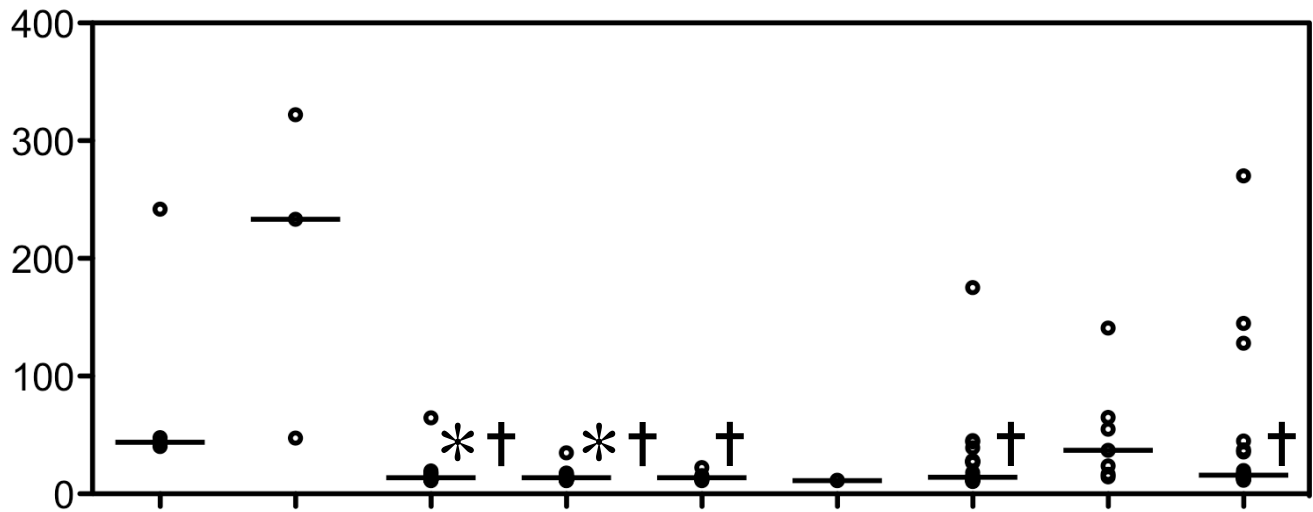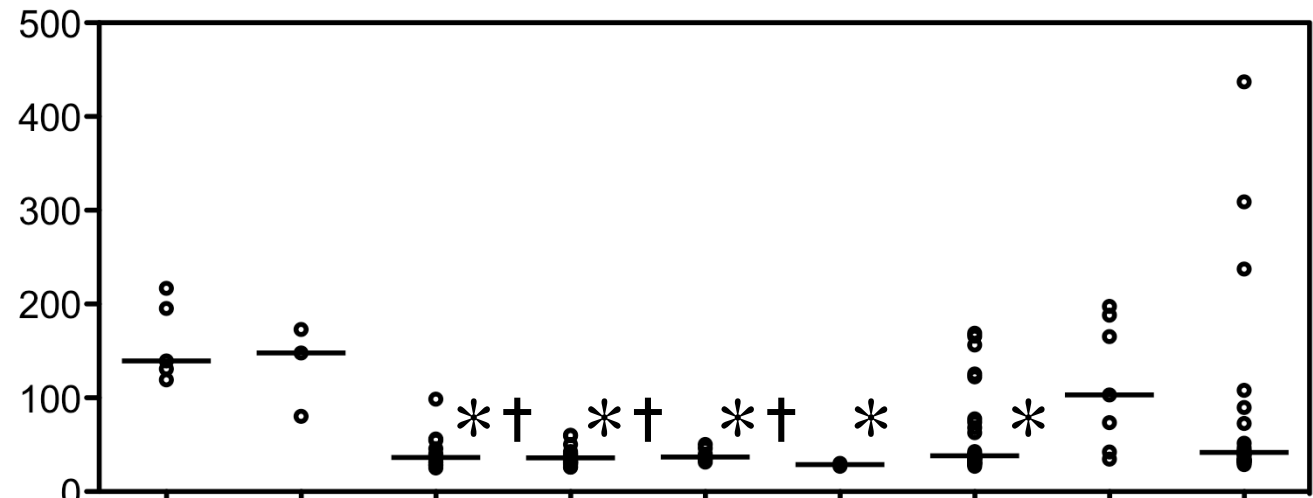

CD34+ BM (5)  
 CD19+ CB (3)  
 TEL-AML1 (15)  
 Hyperdiploid (26)  
 BCR-ABL (7)  
 E2A-PBLX1 (2)  
 Other (24)  
 MLL (7)  
 T-ALL (20)

Supplement: MOESM7 [file 9554562]
